# Supplementary material for: Square-wave adsorptive stripping voltammetric determination of nanomolar levels of bezafibrate using a glassy carbon electrode modified with multi-walled carbon nanotubes within a dihexadecyl hydrogen phosphate film
Source: Royal Society of Chemistry journal article supplement (doi:10.1039/c3an02016a), 2014-01-01
Supplement: c3an02016a.pdf [file c3an02016a.pdf]

## SUPPLEMENTARY MATERIAL

for

**Square-wave adsorptive stripping voltammetric determination of nanomolar levels of bezafibrate using a glassy carbon electrode modified with multi-walled carbon nanotubes within a dihexadecyl hydrogen phosphate film**

Jorge Armando Ardila<sup>a</sup>, Geiser Gabriel Oliveira<sup>b</sup>, Roberta Antigo Medeiros<sup>c</sup> and  
Orlando Fatibello-Filho<sup>a,d\*</sup>

<sup>a</sup>Departamento de Química, Universidade Federal de São Carlos, C.P. 676,  
CEP 13.560-970, São Carlos – SP, Brazil

<sup>b</sup>Instituto de Química de São Carlos, USP – Universidade de São Paulo, C.P. 780,  
CEP 13.560-970, São Carlos – SP, Brazil

<sup>c</sup>Centro de Engenharias e Ciências Exatas, Universidade do Oeste do Paraná,  
CEP 85903-000, Toledo – PR, Brazil

<sup>d</sup>Instituto Nacional de Ciência e Tecnologia de Bioanalítica (INCT de Bioanalítica)

\*Corresponding author. Tel.: +55-16-33518098; Fax +55-16-33518350

e-mail: bello@ufscar.br (O. Fatibello-Filho)

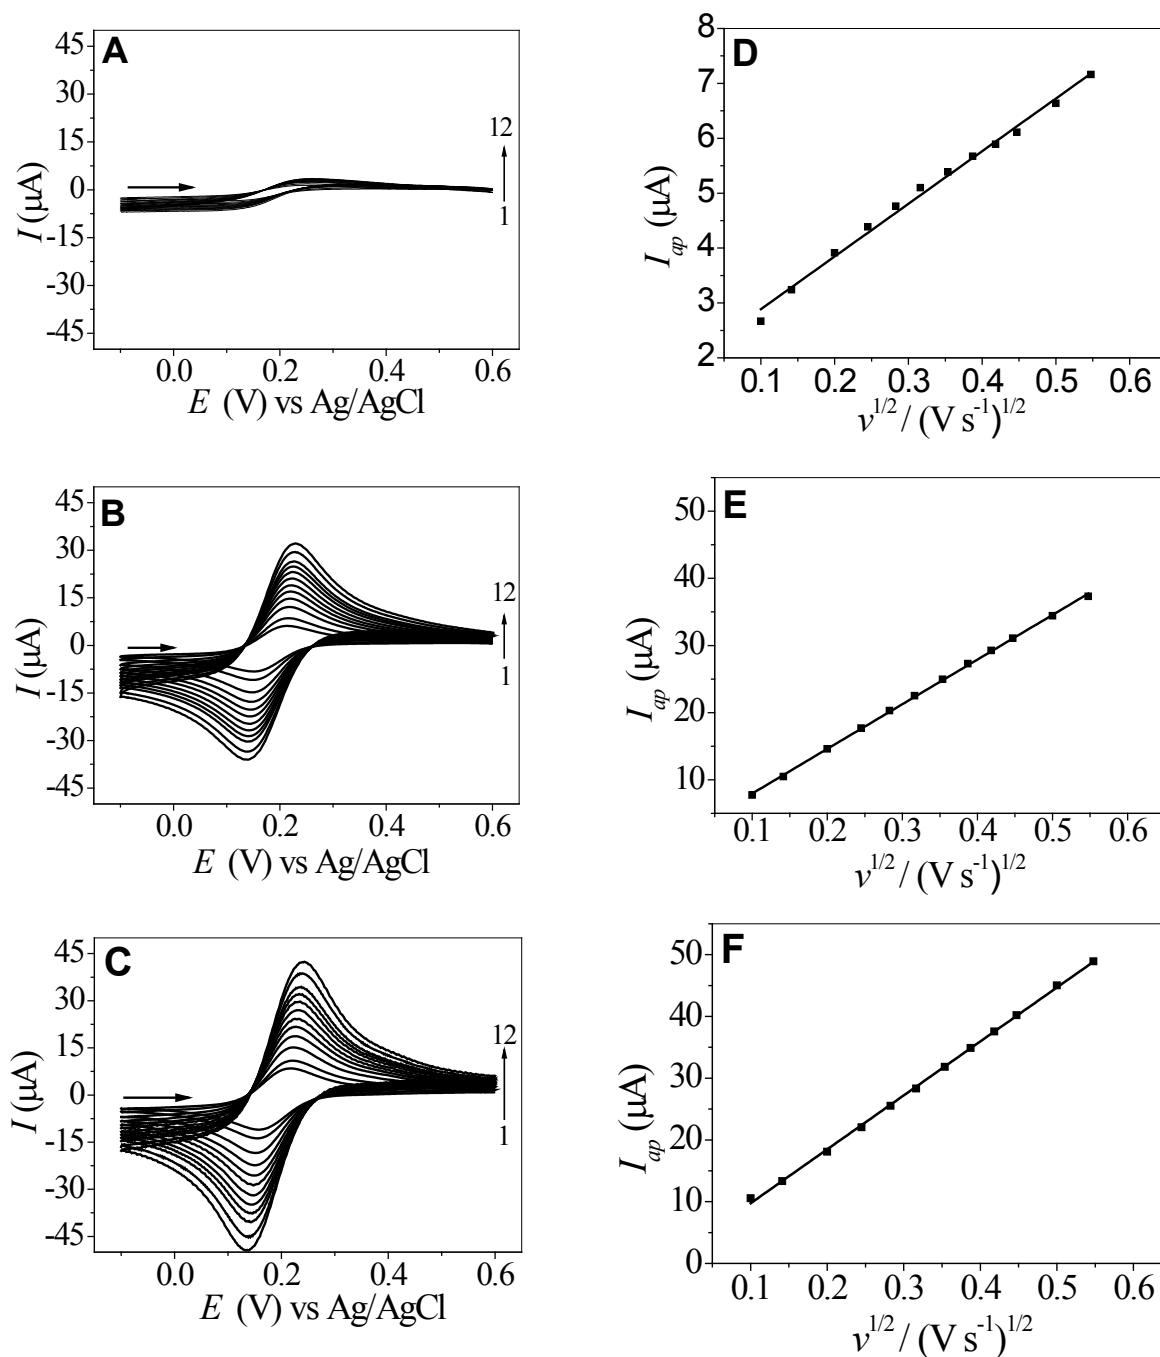

**Figure SM-1:** Cyclic voltammograms for  $1.0 \text{ mmol L}^{-1} \text{ K}_3[\text{Fe}(\text{CN})_6]$  in  $0.1 \text{ mol L}^{-1} \text{ KCl}$  at the (A) DHP/GCE (B) GCE and (C) MWCNT-DHP/GCE at different scan rates ( $\nu$ ): (1) 0.01, (2) 0.02, (3) 0.03, (4) 0.05, (5) 0.07, (6) 0.100, (7) 0.125, (8) 0.150, (9) 0.170, (10) 0.200, (11) 0.250 and (12)  $0.300 \text{ V s}^{-1}$ . Linear dependence of  $I_{ap}$  on  $\nu^{1/2}$  at the (A) DHP/GCE (B) GCE and (C) MWCNTs-DHP/GCE.

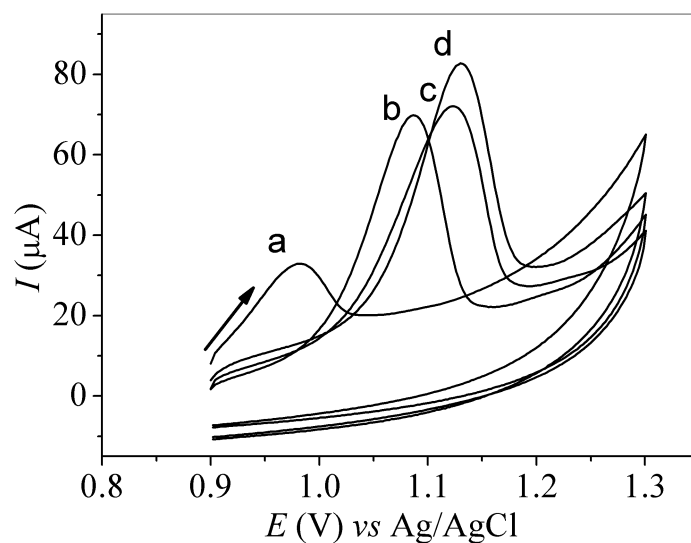

**Figure SM-2:** Cyclic adsorptive stripping voltammograms ( $50 \text{ mV s}^{-1}$ ) of  $300 \text{ nmol L}^{-1}$  BZF in different supporting electrolytes obtained using the MWCNT-DHP/GCE: (a)  $0.10 \text{ mol L}^{-1}$  acetate buffer solution (pH 4.5), (b)  $0.10 \text{ mol L}^{-1}$  phosphate buffer solution (pH 2.0), (c) BR buffer solution (pH 2.0) and (d)  $0.1 \text{ mol L}^{-1}$  sulphuric acid solution. Absorption time 180 s.

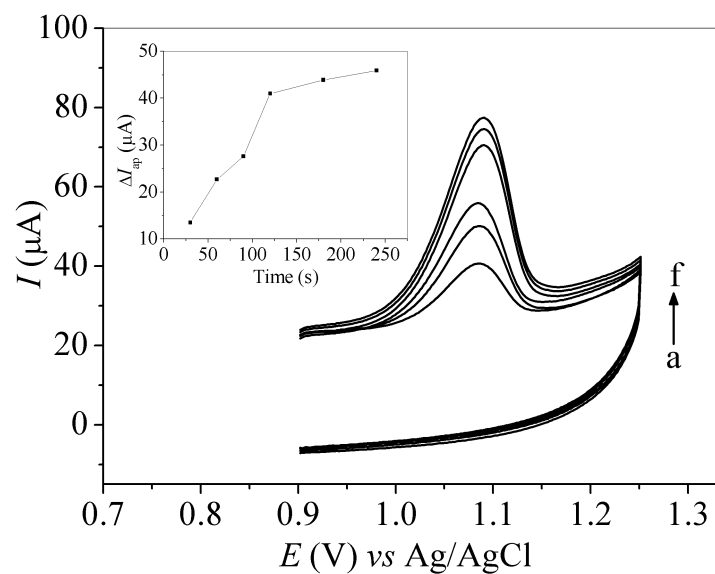

**Figure SM-3:** Cyclic adsorptive stripping voltammograms ( $50 \text{ mV s}^{-1}$ ) of  $300 \text{ nmol L}^{-1}$  BZF in phosphate buffer solution (pH 2.0) at different adsorption times: (a) 30, (b) 60, (c) 90, (d) 120, (e) 180, (f) 240 s. Insert: dependence of  $\Delta I_{ap}$  on adsorption time.

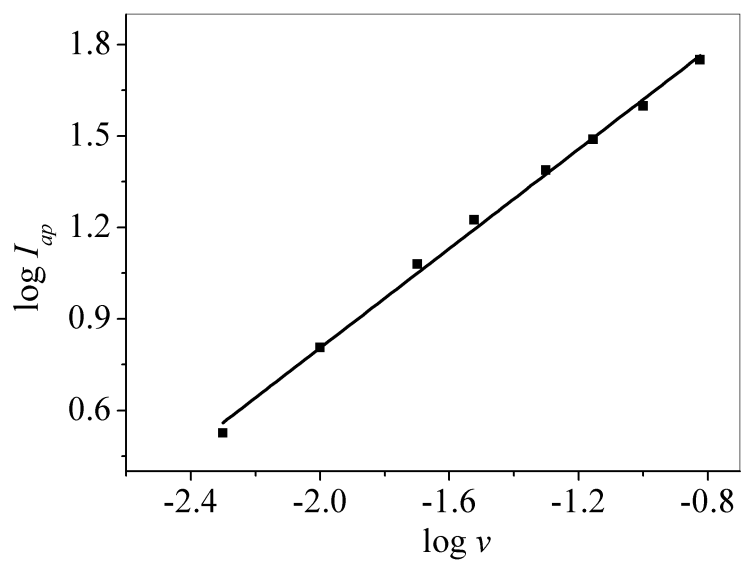

**Figure SM-4:** Linear dependence of  $\log I_{ap}$  on  $\log \nu$  for  $300 \text{ nmol L}^{-1}$  BZF in phosphate buffer solution (pH 2.0) using the MWCNT-DHP/GCE.
